# Supplementary material for: Aerosol trace element solubility and deposition fluxes over the Mediterranean Sea and Black Sea basins
Source: Copernicus journal article supplement (doi:10.5194/bg-22-585-2025), 2025-01-30
Supplement: Supplementary file 1 [file bg-22-585-2025-supplement.pdf]

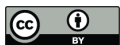

*Supplement of*

## **Aerosol trace element solubility and deposition fluxes over the Mediterranean Sea and Black Sea basins**

**Rachel U. Shelley et al.**

*Correspondence to:* Alex R. Baker ([alex.baker@uea.ac.uk](mailto:alex.baker@uea.ac.uk))

The copyright of individual parts of the supplement might differ from the article licence.

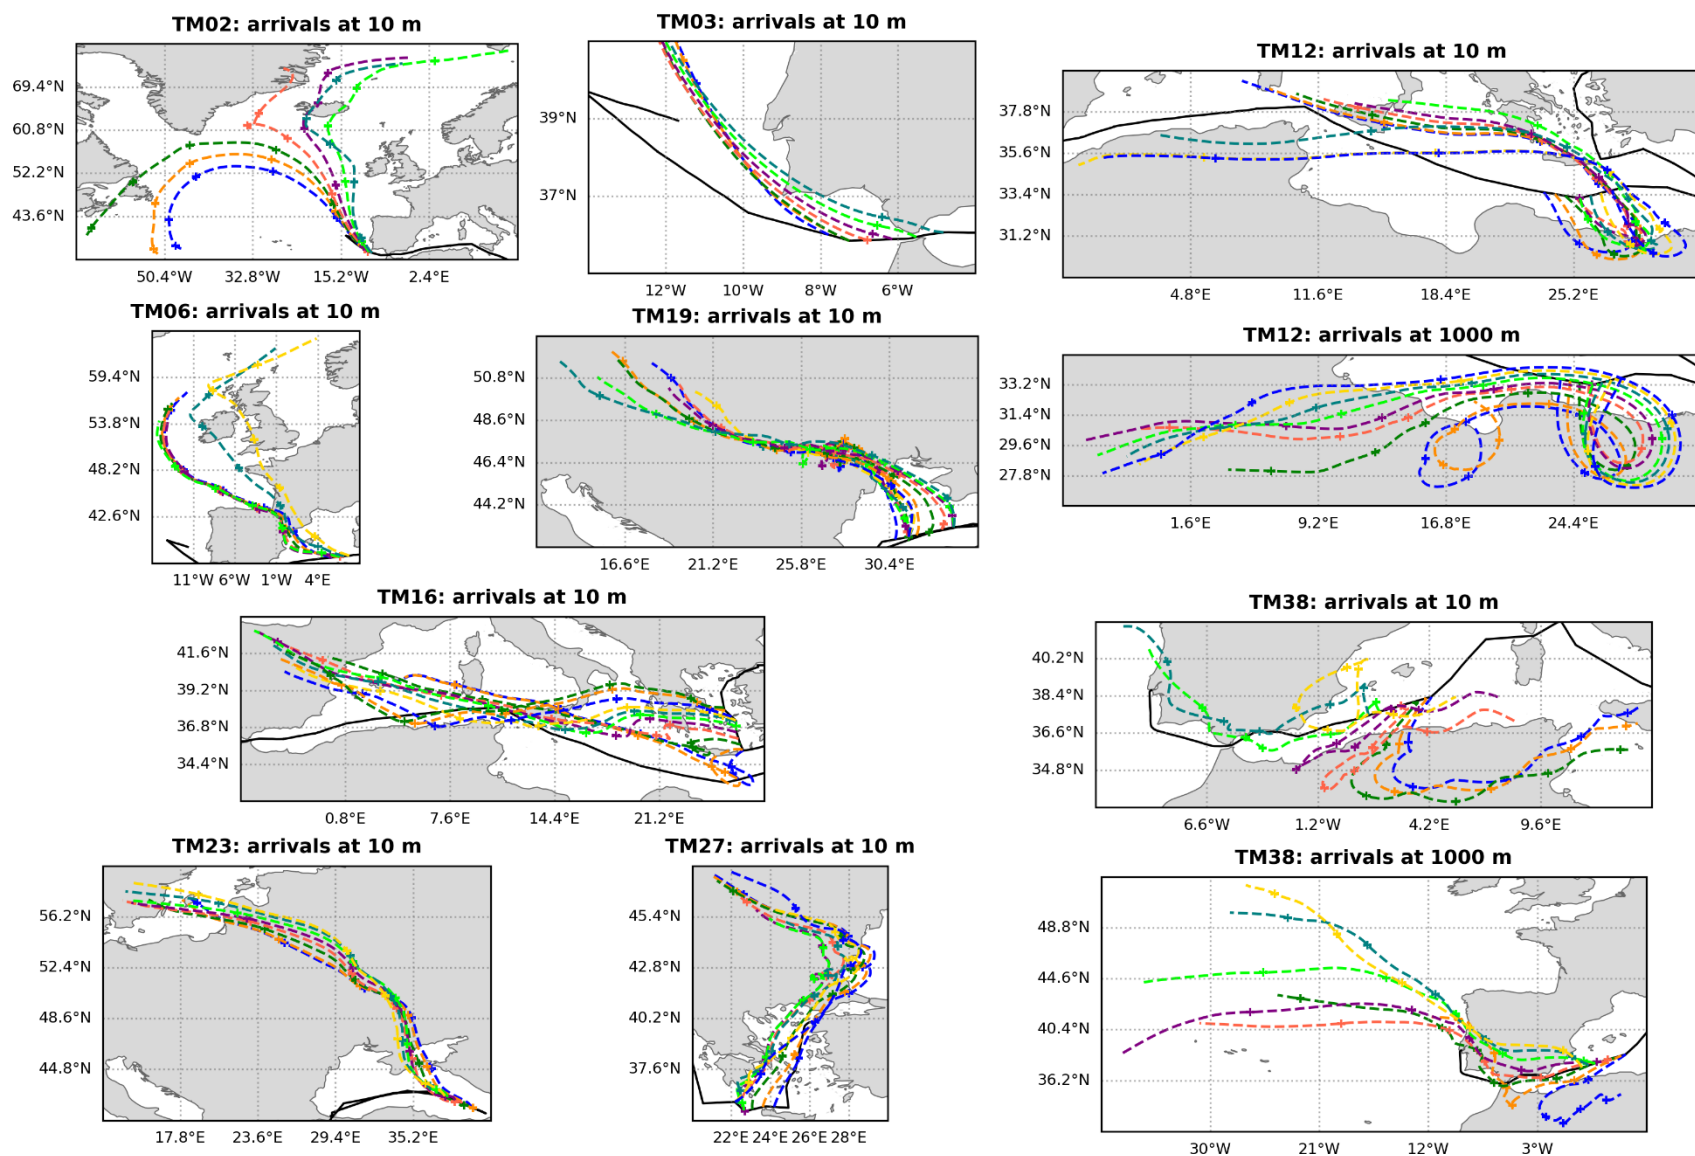

Fig. S1. Example 5-day air mass back trajectories for GA04. Trajectories are plotted every 3 hours during collection of each sample. The map area for sample TM03 is zoomed to show possible interaction of air with Iberia. Trajectories at 1000 m are shown for TM12 and TM38.

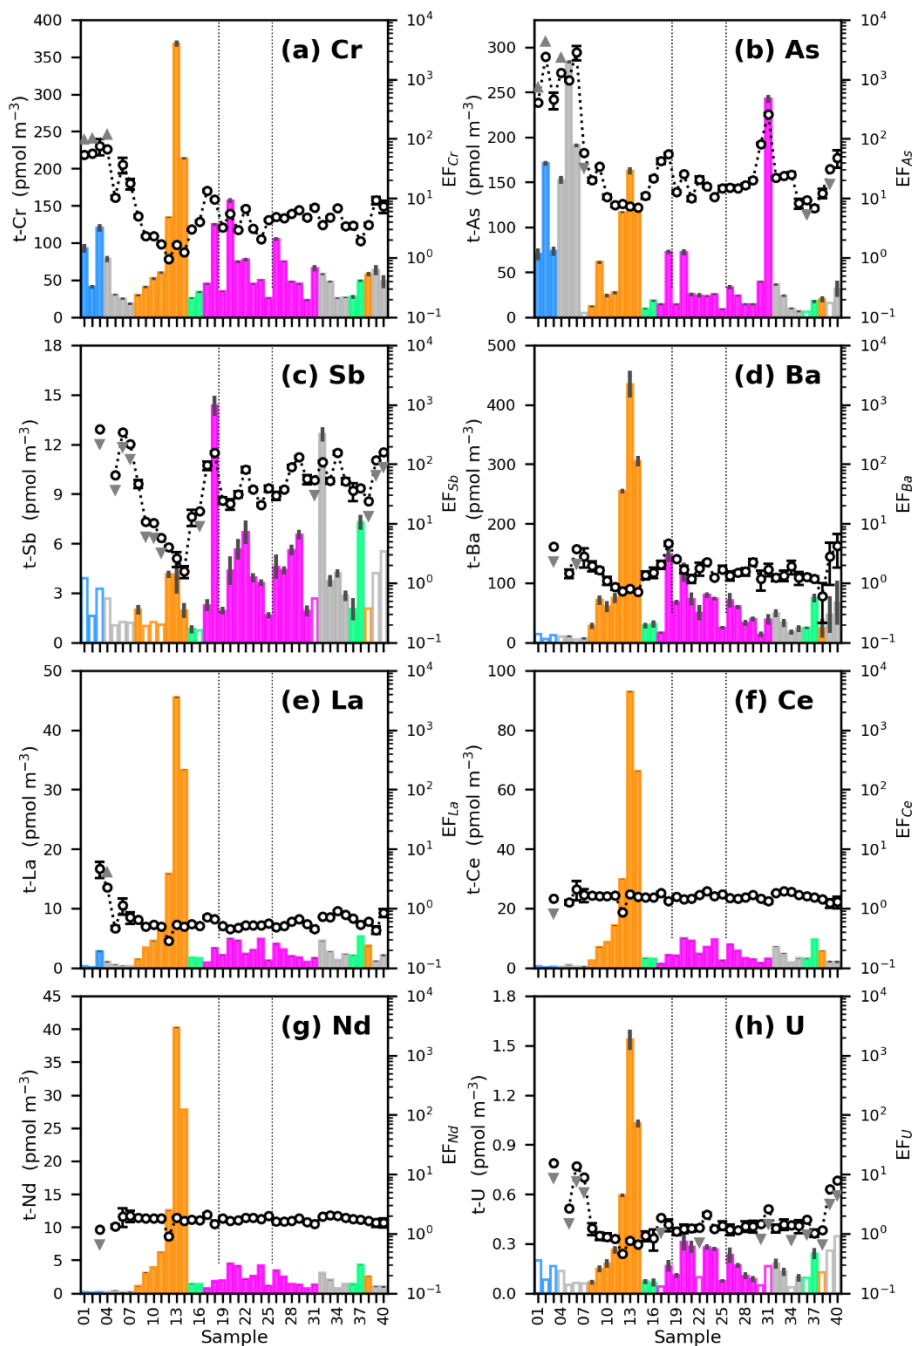

Fig. S2. Total concentrations of Cr, As, Sb, Ba, La, Ce, Nd and U in the GA04 aerosol samples, with enrichment factors relative to Al overlaid (circles). Unfilled bars indicate that analyte was below the limit of detection and bar represents 75% of the limit of detection. An EF was not determined if both Al and the element of interest were below the limit of detection. Up- / down-ward pointing grey arrows near EF markers indicate that values are minima / maxima because Al / the element were below the limit of detection. Bar colours indicate the air mass sampled, blue = RNA, grey = WEU, orange = NAF, green = MED, pink = EEU. The dashed grey vertical lines indicate the legs of the cruise, with Legs 1-3 being left to right.

Table S1. Mean and standard deviation concentrations of elements determined in Arizona Test Dust (ATD) aliquots of ~ 11 – 14 mg, using the HNO<sub>3</sub>-HF digestion method applied in this study (n = 8).

| Element | Concentration (ppm) | Element | Concentration (ppm) |
|---------|---------------------|---------|---------------------|
| Al      | 113000 ± 27000      | P       | 1520 ± 210          |
| Ti      | 3730 ± 570          | V       | 83 ± 17             |
| Mn      | 634 ± 116           | Ni      | 25.8 ± 1.8          |
| Fe      | 26900 ± 4400        | Cu      | 38.0 ± 2.7          |
| Co      | 15.7 ± 3.5          | Zn      | 104 ± 16            |
| Th      | 4.6 ± 1.2           | Cd      | < 0.5               |
| Pb      | 8.7 ± 1.8           |         |                     |
| Cr      | 63.7 ± 8.0          | As      | 22.1 ± 8.5          |
| Sb      | 1.7 ± 0.2           | Ba      | 360 ± 85            |
| La      | 15.8 ± 6.0          | Ce      | 28.8 ± 8.2          |
| Nd      | 13.4 ± 3.3          | U       | < 0.5               |

Table S2. Median and range concentrations of elements measured in samples from each of the air mass types encountered during GA04.

|                                     | Soluble concentrations (pmol m <sup>-3</sup> ) |                     |                     |                     |                     | Total concentrations (pmol m <sup>-3</sup> ) |                                 |                        |                         |                       |
|-------------------------------------|------------------------------------------------|---------------------|---------------------|---------------------|---------------------|----------------------------------------------|---------------------------------|------------------------|-------------------------|-----------------------|
|                                     | RNA                                            | WEU                 | MED                 | NAF                 | EEU                 | RNA                                          | WEU                             | MED                    | NAF                     | EEU                   |
| PO <sub>4</sub> <sup>3-</sup><br>/P | 47<br>(16-54)                                  | 128<br>(47-222)     | 90<br>(51-382)      | 203<br>(163-547)    | 223<br>(62-352)     | 490<br>(220-550)                             | 390<br>(180-1280)               | 490<br>(360-1060)      | 870<br>(470-5780)       | 1070<br>(300-2060)    |
| Al                                  | 180<br>(150-300)                               | 670<br>(130-2430)   | 490<br>(340-1060)   | 200<br>(60-2170)    | 790<br>(280-8730)   | 2200<br>(900-2700)                           | 8800<br>(1100-27700)            | 14400<br>(13600-44100) | 49400<br>(10100-380900) | 19800<br>(5700-48600) |
| Ti                                  | 0.6<br>(0.3-0.8)                               | 1.3<br>(0.2-5.3)    | 0.4<br>(0.15-1.1)   | 0.3<br>(0.13-3.6)   | 0.4<br>(0.11-4.1)   | 100<br>(95-120)                              | 310<br>(38-870)                 | 580<br>(490-1430)      | 1700<br>(380-13500)     | 840<br>(270-1780)     |
| V                                   | 3.2<br>(1.6-3.8)                               | 105<br>(0.9-1360)   | 50<br>(17-280)      | 42<br>(0.6-390)     | 62<br>(6.9-176)     | 2.6<br>(1.2-45)                              | 67<br>(28-203)                  | 104<br>(65-701)        | 285<br>(60-523)         | 80<br>(14-459)        |
| Mn                                  | 5.1<br>(2.5-6.1)                               | 84<br>(2-457)       | 56<br>(46-85)       | 12<br>(0.9-222)     | 110<br>(29-1260)    | 14<br>(6-35)                                 | 66<br>(17-200)                  | 79<br>(70-212)         | 208<br>(61-1660)        | 199<br>(61-346)       |
| Fe                                  | 30<br>(21-37)                                  | 320<br>(13-1340)    | 110<br>(93-290)     | 54<br>(12-620)      | 180<br>(110-1390)   | 580<br>(340-710)                             | 2800<br>(390-8600)              | 4300<br>(3600-12600)   | 12500<br>(3400-99000)   | 8100<br>(2400-19300)  |
| Co                                  | 0.10<br>(0.05-0.12)                            | 1.02<br>(0.03-10.9) | 0.81<br>(0.23-1.08) | 0.62<br>(0.02-2.72) | 1.27<br>(0.34-16.9) | 1.0<br>(0.4-4.6)                             | 1.7<br>(0.4-4.3)                | 2.5<br>(2.0-6.3)       | 6.0<br>(1.9-48)         | 3.2<br>(1.3-6.4)      |
| Ni                                  | 2.0<br>(1-2.4)                                 | 31.5<br>(0.6-512)   | 15.5<br>(4.3-47.4)  | 13.4<br>(0.3-111)   | 13.4<br>(1.8-77.9)  | 5.8<br>(5.4-72)                              | 31<br>(15-97)                   | 45<br>(27-187)         | 81<br>(21-156)          | 38<br>(8.4-147)       |
| Cu                                  | 21<br>(10-25)                                  | 24<br>(6-320)       | 10<br>(3-37)        | 57<br>(6-246)       | 20<br>(8-243)       | 31<br>(13-321)                               | 63<br>(21-95)                   | 44<br>(39-80)          | 25<br>(12-149)          | 48<br>(9-206)         |
| Zn                                  | 150<br>(80-590)                                | 150<br>(50-840)     | 100<br>(30-230)     | 250<br>(50-1360)    | 280<br>(70-1220)    | 230<br>(90-530)                              | 180<br>(70-310)*<br>Excl. 10500 | 220<br>(160-280)       | 190<br>(60-760)         | 300<br>(60-1810)      |
| Cd                                  | 0.19<br>(0.09-0.23)                            | 0.95<br>(0.06-2.79) | 0.2<br>(0.15-0.41)  | 0.55<br>(0.11-1.71) | 1.04<br>(0.22-3.12) | 1.6<br>(0.7-3.8)                             | 0.6<br>(0.3-2.0)                | 0.5<br>(0.4-1)         | 0.6<br>(0.3-1.8)        | 1.8<br>(0.3-5.9)      |
| Pb                                  | 1.1<br>(1.0-1.3)                               | 14.9<br>(0.3-48.4)  | 4.4<br>(2.8-10.5)   | 12.4<br>(1.1-37)    | 17.1<br>(4.2-193)   | 3.2<br>(2.2-31)                              | 6.3<br>(3.1-17)                 | 7.9<br>(4.9-52)        | 13<br>(6.3-55)          | 22<br>(2.9-67)        |

|    |                       |                           |                            |                            |                       |                     |                     |                     |                     |                     |
|----|-----------------------|---------------------------|----------------------------|----------------------------|-----------------------|---------------------|---------------------|---------------------|---------------------|---------------------|
| Th | 0.022<br>(0.01-0.024) | 0.04<br>(0.006-<br>0.263) | 0.036<br>(0.017-<br>0.043) | 0.009<br>(0.004-<br>0.072) | 0.048<br>(0.015-1.34) | 0.11<br>(0.06-0.14) | 0.17<br>(0.04-0.66) | 0.27<br>(0.24-0.78) | 0.72<br>(0.18-6.17) | 0.37<br>(0.11-0.86) |
|----|-----------------------|---------------------------|----------------------------|----------------------------|-----------------------|---------------------|---------------------|---------------------|---------------------|---------------------|

Table S3. Molar elemental ratios to Al for Saharan aerosol samples from previous studies collected over the Atlantic (Shelley et al., 2015; Jickells et al., 2016) and eastern Mediterranean (Herut et al., 2016) and for all air mass types encountered during GA04.

|       | Shelley               | Jickells              | Herut                 | This study (GA04)     |                       |                       |                       |                       |
|-------|-----------------------|-----------------------|-----------------------|-----------------------|-----------------------|-----------------------|-----------------------|-----------------------|
|       | Saharan Aerosols      |                       |                       | Air mass type         |                       |                       |                       |                       |
|       |                       |                       |                       | NAF                   | EEU                   | WEU                   | MED                   | RNA                   |
| P/Al  |                       | 0.016                 | 0.007                 | 0.021                 | 0.055                 | 0.089                 | 0.029                 | 0.202                 |
| Ti/Al | 0.044                 | 0.027                 | 0.026                 | 0.033                 | 0.037                 | 0.037                 | 0.037                 | 0.050                 |
| V/Al  | 0.0015                | 0.010                 |                       | 0.007                 | 0.010                 | 0.016                 | 0.009                 | 0.016                 |
| Mn/Al | $6.3 \times 10^{-3}$  | $5.0 \times 10^{-3}$  | $5.0 \times 10^{-3}$  | $4.5 \times 10^{-3}$  | $8.7 \times 10^{-3}$  | $9.5 \times 10^{-3}$  | $5.2 \times 10^{-3}$  | $12.9 \times 10^{-3}$ |
| Fe/Al | 0.37                  | 0.30                  | 0.33                  | 0.25                  | 0.37                  | 0.36                  | 0.29                  | 0.26                  |
| Co/Al | $0.16 \times 10^{-3}$ | $0.17 \times 10^{-3}$ |                       | $0.13 \times 10^{-3}$ | $0.18 \times 10^{-3}$ | $0.25 \times 10^{-3}$ | $0.16 \times 10^{-3}$ | $1.7 \times 10^{-3}$  |
| Ni/Al | 0.00046               |                       | 0.0003                | 0.0020                | 0.0036                | 0.0063                | 0.0031                | 0.0265                |
| Cu/Al | 0.0003                | 0.0005                | 0.0004                | 0.0064                | 0.0039                | 0.0125                | 0.0032                | 0.118                 |
| Zn/Al | 0.0008                | 0.0019                | 0.0014                | 0.005                 | 0.021                 | 0.168                 | 0.012                 | 0.196                 |
| Cd/Al | $4 \times 10^{-6}$    | $5.8 \times 10^{-6}$  | $1 \times 10^{-6}$    | $16 \times 10^{-6}$   | $99 \times 10^{-6}$   | $144 \times 10^{-6}$  | $31 \times 10^{-6}$   | $850 \times 10^{-6}$  |
| Pb/Al | $0.08 \times 10^{-3}$ | 0.0001                | $0.05 \times 10^{-3}$ | 0.0004                | 0.0012                | 0.0018                | 0.0007                | 0.0115                |
| Th/Al | $24 \times 10^{-6}$   | $18 \times 10^{-6}$   |                       | $15 \times 10^{-6}$   | $20 \times 10^{-6}$   | $27 \times 10^{-6}$   | $18 \times 10^{-6}$   |                       |

Table S4. Representative (mean) elemental concentrations and enrichment factors (EF) for aerosols collected during shipboard sampling in the Mediterranean from previous studies and during GA04. Published data from Chester et al. (1984) (Ches84) for air mass arrivals from North Africa (Sahara) and the Mediterranean (Med.), Chester et al. (1993) (Ches93) and Moreno et al. (2010) (More10).

|    | Ches84 (Sahara)      |     | Ches84 (Med.)        |      | Ches93               |     | More10               |     | GA04                 |     |
|----|----------------------|-----|----------------------|------|----------------------|-----|----------------------|-----|----------------------|-----|
|    | pmol m <sup>-3</sup> | EF  | pmol m <sup>-3</sup> | EF   | pmol m <sup>-3</sup> | EF  | pmol m <sup>-3</sup> | EF  | pmol m <sup>-3</sup> | EF  |
| P  |                      |     |                      |      |                      |     | 660                  | 9.5 | 1050                 | 6.9 |
| Al | 74100                |     | 4150                 |      | 548000               |     | 32000                |     | 47000                |     |
| Ti |                      |     |                      |      |                      |     | 970                  | 1.3 | 1600                 | 1.1 |
| V  |                      |     |                      |      |                      |     | 340                  | 42  | 200                  | 17  |
| Mn | 337                  | 0.8 | 78                   | 1.0  | 2900                 | 1.6 | 180                  | 2.2 | 230                  | 1.5 |
| Fe | 22400                | 0.9 | 2100                 | 1.0  | 181000               | 1.1 | 9500                 | 1.8 | 12000                | 1.1 |
| Co |                      |     |                      |      |                      |     | 4.9                  | 4.0 | 6.1                  | 1.9 |
| Ni | 53                   | 3   | 22                   | 5    | 240                  | 17  | 95                   | 29  | 68                   | 14  |
| Cu | 42                   | 6   | 31                   | 28   | 190                  | 15  | 92                   | 65  | 63                   | 25  |
| Zn | 128                  | 6   | 184                  | 120  | 400                  | 86  | 280                  | 91  | 640                  | 110 |
| Cd | 3                    | 96  | 4                    | 1220 | 2.4                  | 520 | 2.6                  | 320 | 1.0                  | 92  |
| Pb | 36                   | 46  | 53                   | 770  | 65                   | 490 | 44                   | 150 | 16                   | 35  |
| Th |                      |     |                      |      |                      |     | 1.0                  | 1.9 | 0.7                  | 1.2 |

Table S5. Representative (mean or range) elemental concentrations and enrichment factors (EF) for aerosols collected during shipboard sampling in the Black Sea from previous studies and during GA04. Published data from Hacasalihoglu et al. (1992) (Hac92) in the western (West) and eastern (East) basins and Kubilay et al. (1995) (Kub95).

|    | Hac92 (West)         |     | Hac92 (East)         |     | Kub95                |          | GA04                 |     |
|----|----------------------|-----|----------------------|-----|----------------------|----------|----------------------|-----|
|    | pmol m <sup>-3</sup> | EF  | pmol m <sup>-3</sup> | EF  | pmol m <sup>-3</sup> | EF       | pmol m <sup>-3</sup> | EF  |
| P  |                      |     |                      |     |                      |          | 1400                 | 7.2 |
| Al | 20000                |     | 12000                |     | 13000-64000          |          | 30000                |     |
| Ti |                      |     |                      |     |                      |          | 1000                 | 1.1 |
| V  | 55                   | 3.2 | 35                   | 3.4 | 0.2-90               | 0.02-1.6 | 48                   | 1.9 |
| Mn | 310                  | 3.0 | 310                  | 4.8 | 91-1600              | 1.3-4.9  | 230                  | 1.5 |
| Fe | 7500                 | 1.3 | 5200                 | 1.5 | 4600-65000           | 1.2-3.6  | 11000                | 1.3 |
| Co | 4.2                  | 1.9 | 2.7                  | 2.0 | 0.2-9.0              | 0.1-1.3  | 4.2                  | 1.3 |
| Ni | 84                   | 11  | 51                   | 11  | 36-200               | 7.1-8.2  | 25                   | 2.2 |
| Cu | 2.2                  | 0.5 |                      |     |                      |          | 54                   | 6.9 |
| Zn | 700                  | 72  | 400                  | 66  | 46-1100              | 7.2-34   | 330                  | 24  |
| Cd |                      |     |                      |     | 2.7-40               | 230-700  | 2.7                  | 110 |
| Pb | 290                  | 440 | 180                  | 450 | 8.7-230              | 21-110   | 30                   | 32  |
| Th | 0.5                  | 1.4 | 0.2                  | 1.1 |                      |          | 0.6                  | 1.2 |

Table S6. Mean, median and ranges of dry deposition fluxes for soluble Al (s-Al), Ti (s-Ti), V (s-V), Co (s-Co), Cu (s-Cu), Pb (s-Pb) and Th (s-Th) over the western and eastern Mediterranean and Black Sea basins.

|                    | s-Al                                 | s-Ti                                 | s-V                                  | s-Co                                 | s-Cu                                 | s-Pb                                 | s-Th                                 |
|--------------------|--------------------------------------|--------------------------------------|--------------------------------------|--------------------------------------|--------------------------------------|--------------------------------------|--------------------------------------|
| <b>Western Med</b> | nmol m <sup>-2</sup> d <sup>-1</sup> |
| Mean               | 847                                  | 1.27                                 | 18.2                                 | 1.72                                 | 5.9                                  | 1.40                                 | 0.059                                |
| Median             | 688                                  | 1.11                                 | 12.1                                 | 0.90                                 | 2.1                                  | 1.26                                 | 0.037                                |
| min                | 116                                  | 0.18                                 | 0.1                                  | 0.03                                 | 0.5                                  | 0.03                                 | 0.006                                |
| max                | 2100                                 | 4.55                                 | 117                                  | 9.42                                 | 27.6                                 | 4.18                                 | 0.228                                |
| <b>Eastern Med</b> |                                      |                                      |                                      |                                      |                                      |                                      |                                      |
| Mean               | 935                                  | 0.90                                 | 6.1                                  | 1.59                                 | 4.7                                  | 2.33                                 | 0.074                                |
| Median             | 423                                  | 0.26                                 | 2.2                                  | 0.86                                 | 1.5                                  | 1.10                                 | 0.029                                |
| min                | 56                                   | 0.09                                 | 0.05                                 | 0.02                                 | 0.3                                  | 0.10                                 | 0.003                                |
| max                | 7540                                 | 3.52                                 | 33.9                                 | 14.6                                 | 21.2                                 | 16.6                                 | 0.793                                |
| <b>Black Sea</b>   |                                      |                                      |                                      |                                      |                                      |                                      |                                      |
| Mean               | 1280                                 | 0.57                                 | 7.3                                  | 2.40                                 | 4.2                                  | 1.05                                 | 0.203                                |
| Median             | 553                                  | 0.39                                 | 8.5                                  | 1.09                                 | 4.0                                  | 0.87                                 | 0.036                                |
| min                | 352                                  | 0.20                                 | 0.9                                  | 0.44                                 | 1.3                                  | 0.37                                 | 0.013                                |
| max                | 5750                                 | 1.34                                 | 12.9                                 | 11.0                                 | 10.3                                 | 2.01                                 | 1.16                                 |



## References

- Chester, R., Sharples, E. J., Sanders, G. S., and Saydam, A. C.: Saharan dust incursion over the Tyrrhenian Sea, *Atmospheric Environment* (1967), 18, 929-935, 10.1016/0004-6981(84)90069-6, 1984.
- Chester, R., Nimmo, M., Alarcon, M., Saydam, C., Murphy, K. J. T., Sanders, G. S., and Corcoran, P.: Defining the chemical character of aerosols from the atmosphere of the Mediterranean Sea and surrounding regions, *Oceanol. Acta*, 16, 231-246, 1993.
- Hacisalihoglu, G., Eliyakut, F., Olmez, I., Balkas, T. I., and Tuncel, G.: Chemical composition of particles in the Black Sea atmosphere, *Atmospheric Environment Part A-General Topics*, 26, 3207-3218, 10.1016/0960-1686(92)90477-3, 1992.
- Herut, B., Rahav, E., Tsagaraki, T. M., Giannakourou, A., Tsiola, A., Psarra, S., Lagaria, A., Papageorgiou, N., Mihalopoulos, N., Theodosi, C. N., Violaki, K., Stathopoulou, E., Scoullou, M., Krom, M. D., Stockdale, A., Shi, Z., Berman-Frank, I., Meador, T. B., Tanaka, T., and Paraskevi, P.: The potential impact of Saharan dust and polluted aerosols on microbial populations in the East Mediterranean Sea, an overview of a mesocosm experimental approach, *Frontiers in Marine Science*, 3, 226, 10.3389/fmars.2016.00226, 2016.
- Jickells, T. D., Baker, A. R., and Chance, R.: Atmospheric transport of trace elements and nutrients to the oceans, *Philosophical Transactions of the Royal Society of London Series A-Mathematical Physical and Engineering Sciences*, 374, 20150286, 10.1098/rsta.2015.0286, 2016.
- Kubilay, N., Yemenicioglu, S., and Saydam, A. C.: Airborne material collections and their chemical composition over the Black Sea, *Marine Pollution Bulletin*, 30, 475-483, 10.1016/0025-326x(95)00238-i, 1995.
- Moreno, T., Perez, N., Querol, X., Amato, F., Alastuey, A., Bhatia, R., Spiro, B., Hanvey, M., and Gibbons, W.: Physicochemical variations in atmospheric aerosols recorded at sea onboard the Atlantic-Mediterranean 2008 Scholar Ship cruise (Part II): Natural versus anthropogenic influences revealed by PM10 trace element geochemistry, *Atmospheric Environment*, 44, 2563-2576, 10.1016/j.atmosenv.2010.04.027, 2010.
- Shelley, R. U., Morton, P. L., and Landing, W. M.: Elemental ratios and enrichment factors in aerosols from the US-GEOTRACES North Atlantic transects, *Deep Sea Research Part II: Topical Studies in Oceanography*, 116, 262-272, 10.1016/j.dsr2.2014.12.005, 2015.
